# Supplementary material for: Untargeted Lipidomics Analysis Unravels the Different Metabolites in the Fat Body of Mated Bumblebee (Bombus terrestris) Queens
Source: MDPI journal article supplement (doi:10.3390/ijms242015408), 2023-10-21
Supplement: s1 [file s1]

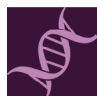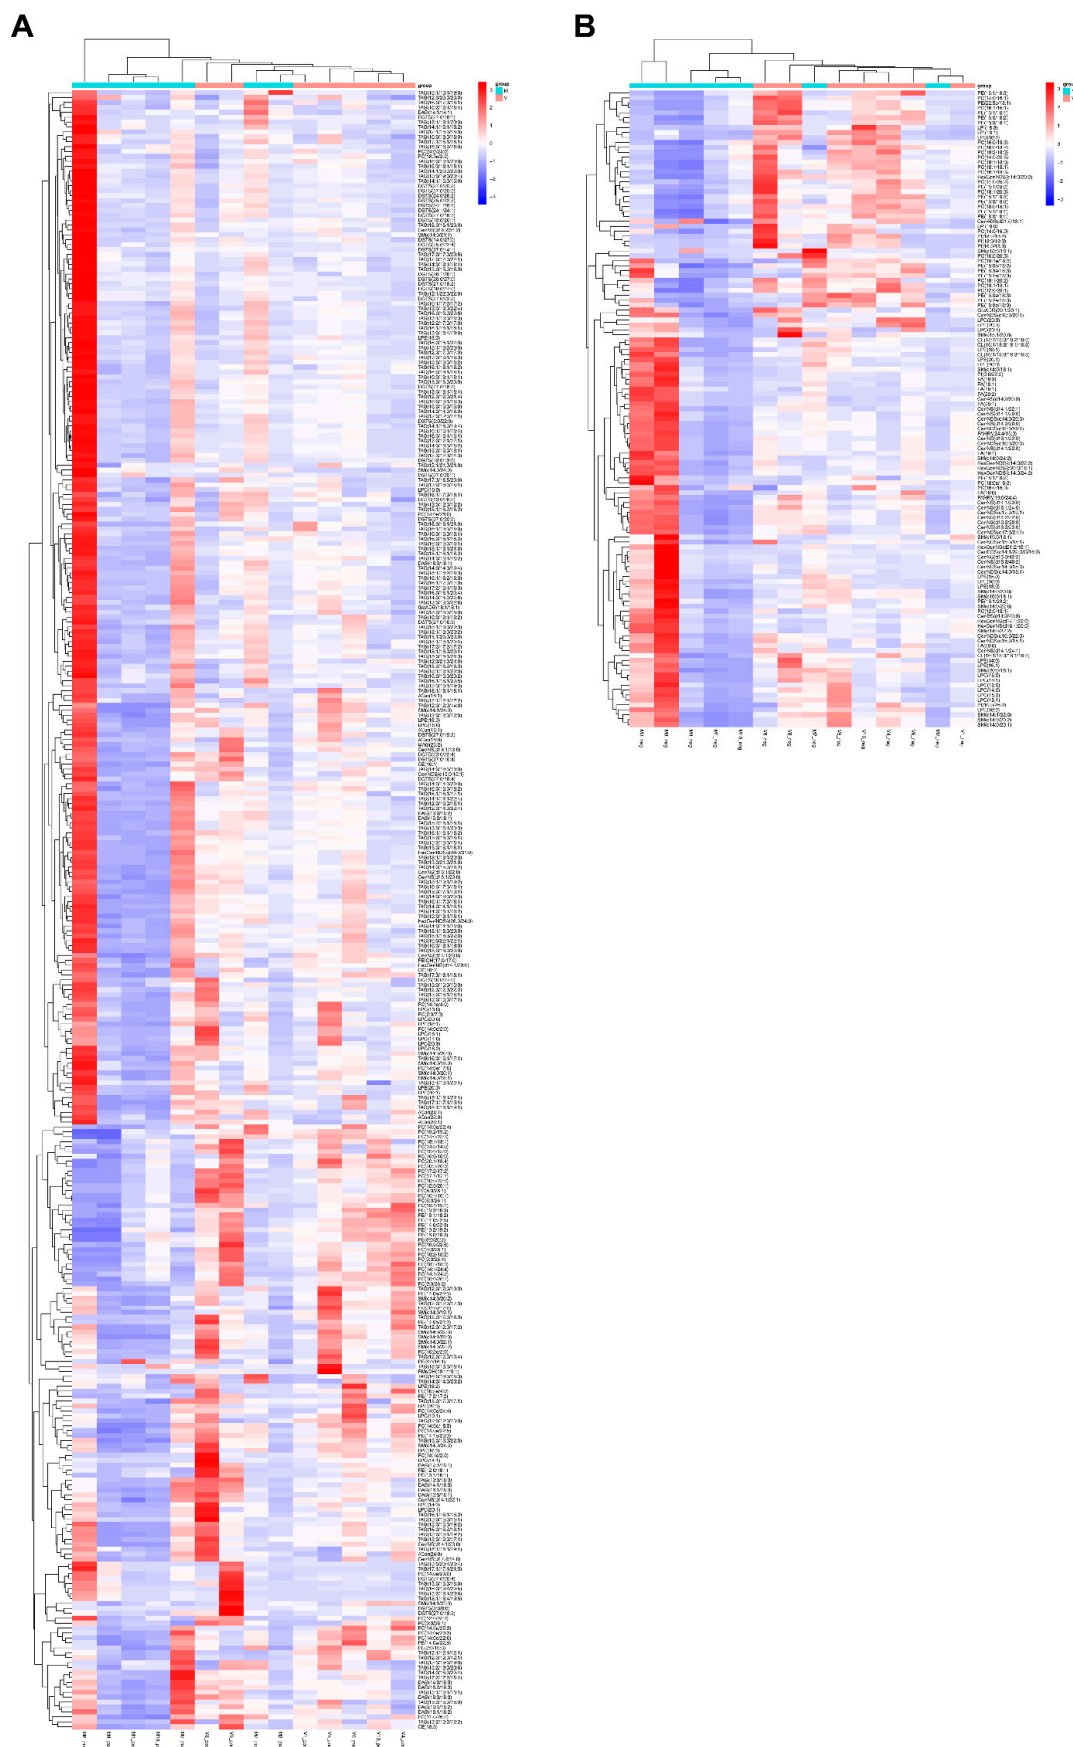

**Figure S1.** Heat map of the HCA of the differential metabolites in the comparison of virgin and mated in the bumblebee (*B. terrestris*). **(A)** Differential metabolites were separated using hierarchical clustering in the positive ion detection mode. **(B)** Differential metabolites were separated using hierarchical clustering in the negative ion detection mode. The x-axis has the seven biological replicates of fat body, and the y-axis represents the differential metabolites separated using hierarchical clustering.

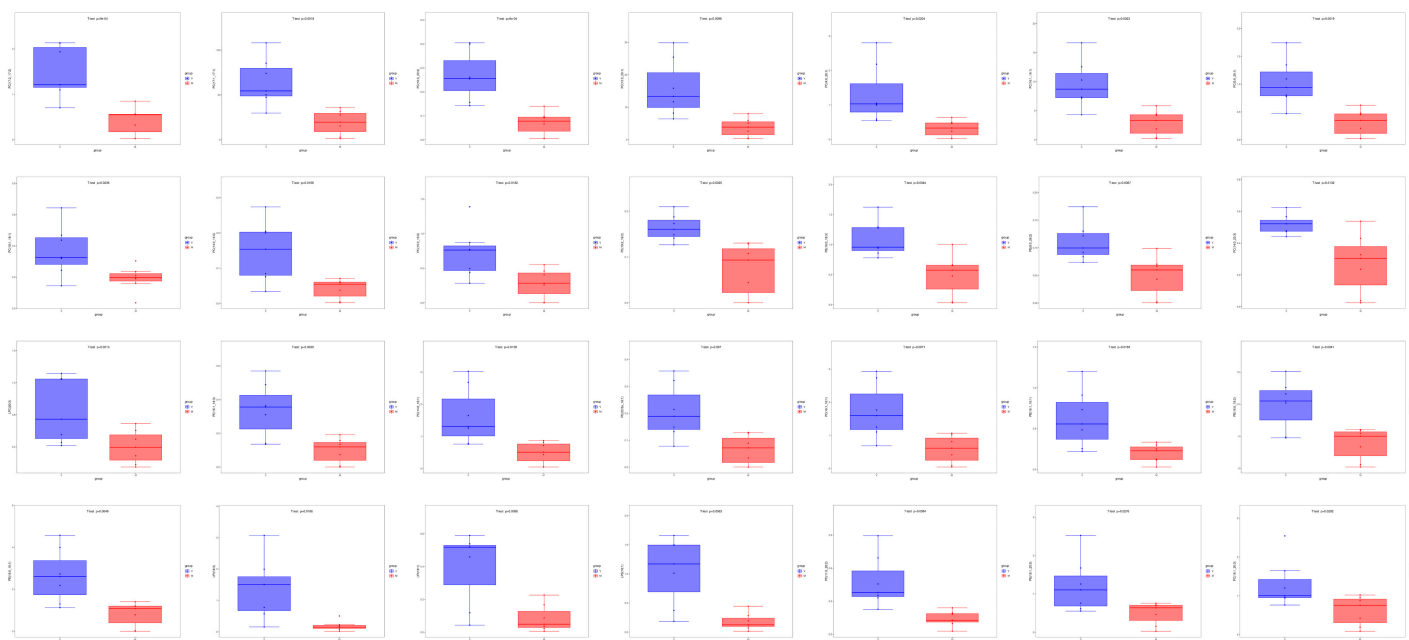

**Figure S2.** Box plot analysis of 28 metabolites. Most of lipid metabolites were significantly decreased in the fat body of mated bumblebee queens.

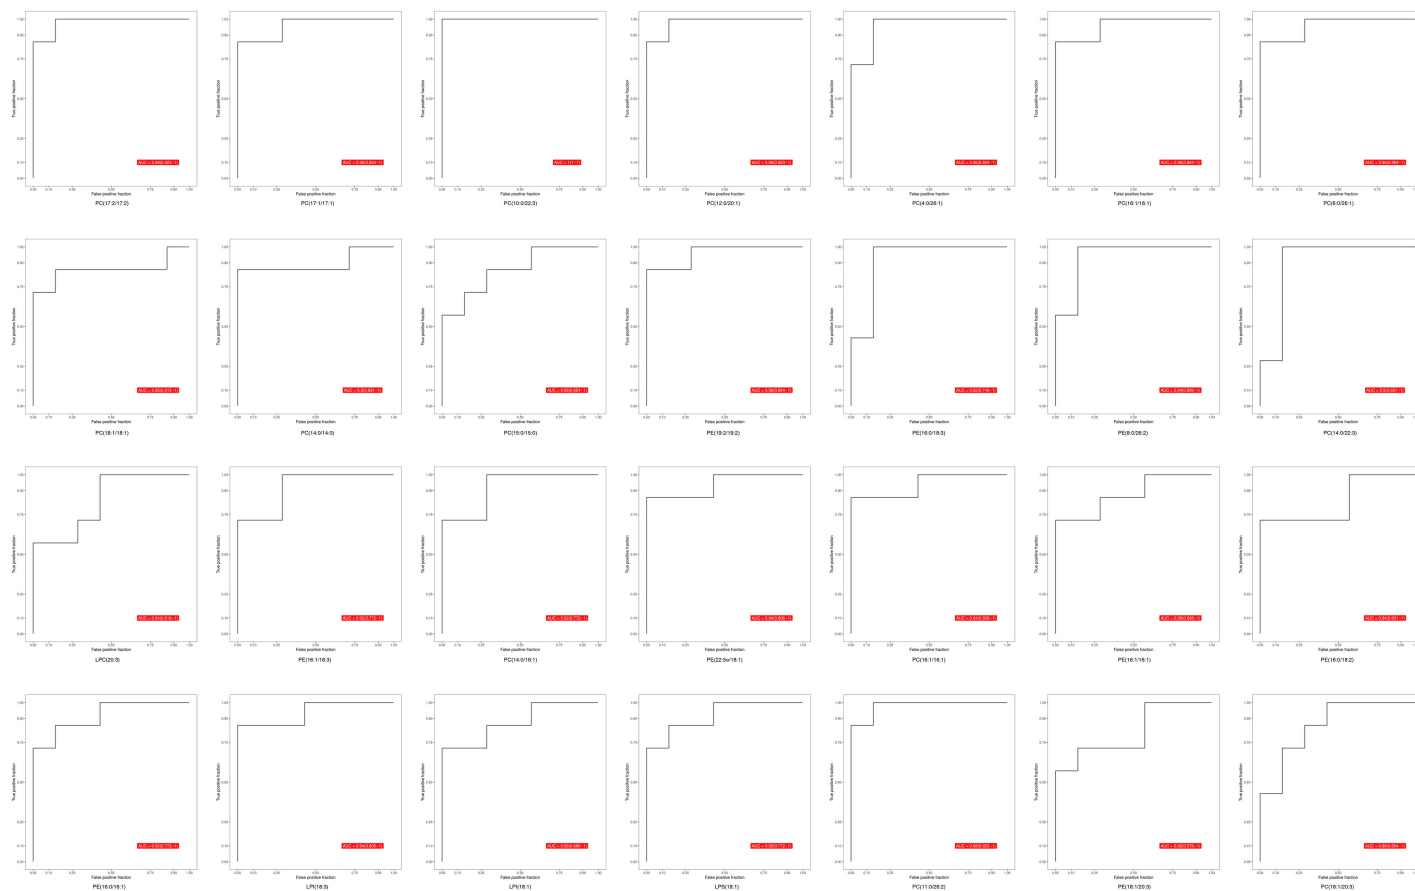

**Figure S3.** The ROC curve analysis of the 28 metabolites. All of these AUC values are above 0.8, and most are above 0.9, so the accuracy is good.
